# Supplementary material
Source: Springer Nature journal article supplement (https://www.springermedizin.de/resource/supplementary/12874_2012_774_MOESM4_ESM.pdf/9432926)

Gamma distributions

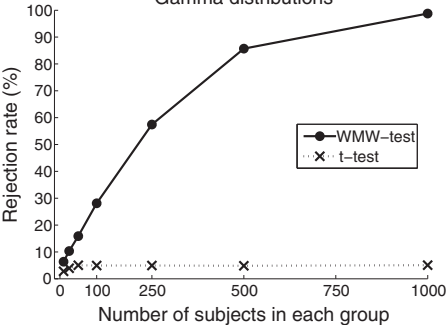

Lognormal distributions

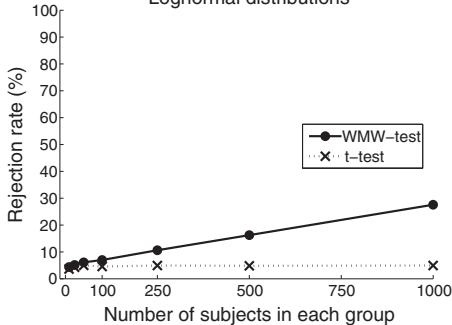

Supplement: MOESM4 [file 9432926]
